# Supplementary material for: NF-YC12 is a key multi-functional regulator of accumulation of seed storage substances in rice
Source: PubMed Central journal article supplement — J Exp Bot. 2019 Apr 11;70(15):3765–80. doi: 10.1093/jxb/erz168 (PMC6685661; doi:10.1093/jxb/erz168), 2019-04-11
Supplement: erz168_suppl_supplementary_tables_s1-s3.pdf [file erz168_suppl_supplementary_tables_s1-s3.pdf]

**Supplementary Table S1. Primers used in this study**

| <b>Primers for plasmid construction</b>  |                               |                                             |
|------------------------------------------|-------------------------------|---------------------------------------------|
| <b>Primer name</b>                       | <b>Sequence (5'-3')</b>       | <b>Description</b>                          |
| NF-YC12-CRISPR                           | F: ATGCCATGGAGAAGTTCTGG       | CRISPR-Cas9 construct of<br><i>NF-YC12</i>  |
|                                          | R: CCAGAACTTCTCCATGGCAT       |                                             |
| NF-YC12-OE                               | F: GGTACCATGCCGATCCCGGAAA     | <i>NF-YC12</i> -overexpression<br>construct |
|                                          | R: GGATCCCTCAGGAAGATCTTTGTC   |                                             |
| In situ-NF-YC12                          | F: AGAAAAATCCCCACTGAAGG       | <i>In situ</i> hybridization analysis       |
|                                          | R: TGTGCTGTTTCGCCTTTC         |                                             |
| NF-YB1-GFP                               | F: TCTAGAATGGCAGGGAACAAAA     | Subcellular localization                    |
|                                          | R: TCTAGACATATTTTTTCCATAGCC   |                                             |
| NF-YC12-YFP                              | F: TCTAGAATGCCGATCCCGGAAA     |                                             |
|                                          | R: TCTAGACTCAGGAAGATCTTTGTC   |                                             |
| NF-YB1-cCFP                              | F: GAATTCATGGCAGGGAACAAAA     | BiFC experiment                             |
|                                          | R: GGATCCGCATATTTTTTCCATAGC   |                                             |
| NF-YC12-cCerulean                        | F: GAATTCATGCCGATCCCGGAAA     |                                             |
|                                          | R: GGATCCGCTCAGGAAGATCTTTGT   |                                             |
| GST-NF-YB1                               | F: GGATCCATGGCAGGGAACAAAA     | GST-pull down                               |
|                                          | R: GAATTCATATTTTTTCCATAGCC    |                                             |
| His-NF-YC12                              | F: GGATCCATGCCGATCCCGGAAA     |                                             |
|                                          | R: GAATTCCTCAGGAAGATCTTTGTC   |                                             |
| Y2H-NF-YA8                               | F: GAATTCATGGGTTTTGGTGAAA     | Yeast two-hybrid                            |
|                                          | R: CGCTGCAGGAGATCTCCTGTAAAA   |                                             |
| Y2H-NF-YB1                               | F: GAATTCATGGCAGGGAACAAAA     |                                             |
|                                          | R: GGATCCCATATTTTTTCCATAGCC   |                                             |
| Y2H-NF-YC10                              | F: GAATTCATGAAGCAAACCTTTGG    |                                             |
|                                          | R: GGATCCCTTGTTGCCATTACT      |                                             |
| Y2H-NF-YC12-FL                           | F: GAATTCATGCCGATCCCGGAAA     |                                             |
|                                          | R: GGATCCCTCAGGAAGATCTTTGTC   |                                             |
| Y2H-NF-YC12-HFM                          | F: GAATTCGCAGGCAACGAAGAGCT    |                                             |
|                                          | R: CTGCAGGGTGATTGCCTCAGCAAT   |                                             |
| OsSUT1-pHis2                             | F: GAATTCACTTCAATGTCAAACCGCG  | Yeast one-hybrid                            |
|                                          | R: GAGCTCAAGGAAATCGAGTGGAGGAA |                                             |
| OsGS1;3-pHis2                            | F: GAATTCTGTAGCCAAATTAAGCGTGG |                                             |
|                                          | R: GAGCTCAGAAACGAGAGGGCTCCAAT |                                             |
| NF-YB1-pHis2                             | F: GAATTCCTGAAAACAGTATGCAGGGG |                                             |
|                                          | R: GAGCTCGACCTGTACTATGCT      |                                             |
| FLO6-pHis3                               | F: GAATTCGCAGGTACGCCTTCAAATC  |                                             |
|                                          | R: GAGCTCGGTCGCATTTCCGGTGCT   |                                             |
| <b>Primers for mutant identification</b> |                               |                                             |

|                                     |                              |                                             |
|-------------------------------------|------------------------------|---------------------------------------------|
| Cas9                                | F: GCATGAAGAGGATCGAGGAG      | Check the transgenic plants                 |
|                                     | R: GATCTCTTGCTCGGACTTGG      |                                             |
| pCXUN                               | F: TGTGTGGAATTGTGAGCGGATA    | Check the transgenic plants                 |
|                                     | R: GTTTTACAACGTCGTGACTGGG    |                                             |
| CRISPR-NF-YC12                      | F: GTGGCGTGAATAAC            | Detecting target site of <i>NF-YC12</i>     |
|                                     | R: GGACGAAAAGTTCAC           |                                             |
| CRISPR-off-NF-YC12                  | F: AGTGGCTATACTTCC           | Detecting off-target site of <i>NF-YC12</i> |
|                                     | R: GCAGTCAATTGGTAG           |                                             |
| <b>Primers for qRT-PCR analysis</b> |                              |                                             |
| <b>Gene name</b>                    | <b>Sequence (5'-3')</b>      |                                             |
| <i>Ubiquitin</i>                    | F: AACCAGCTGAGGCCCAAGA       |                                             |
|                                     | R: ACGATTGATTTAACCAGTCCATGA  |                                             |
| <i>NF-YB1</i>                       | F: CAGGGAACAAAAAGCGTGGTGGC   |                                             |
|                                     | R: ATCGGCAGCTCGGC GTTGGT     |                                             |
| <i>NF-YC12</i>                      | F: ATGCTATTGTTGGTGA AAC      |                                             |
|                                     | R: GAAGATCTTTGTCAGGAAAA      |                                             |
| <i>OsSUT1</i>                       | F: TTGTGTTGTGTGTGTGTCAG      |                                             |
|                                     | R: TGATGATGATGGAAGCTCACTT    |                                             |
| <i>OsGS1;3</i>                      | F: AAATCGTACGGGCGGACATCGTT   |                                             |
|                                     | R: ATCCCCTGCGGAGACGCCAACGAC  |                                             |
| <i>FLO6</i>                         | F: CCAGTGCCATCTTTCCTT        |                                             |
|                                     | R: TGCCGCTTTCATACATTA        |                                             |
| <i>OsMST4</i>                       | F: CTCATCCCCAGCGAGACGTT      |                                             |
|                                     | R: TGAGGTGGCAGAGCATGGAG      |                                             |
| <i>OsMST6</i>                       | F: GCGTGGTGGTGAACAACGGA      |                                             |
|                                     | R: TATCCGAAGATGAGGCCGCC      |                                             |
| <i>OsHXK7</i>                       | F: AGATAACCTGAAGATCACAGACAC  |                                             |
|                                     | R: TTCCTGAGGATCCCTACGAT      |                                             |
| <i>OsAGPS1</i>                      | F: GTGCCACTTAAAGGCACCATT     |                                             |
|                                     | R: CCCACATTT CAGACACGGTTT    |                                             |
| <i>OsAGPS2a</i>                     | F: ACTCCAAGAGCTCGCAGACC      |                                             |
|                                     | R: GCCTGTAGTTGGCACCCAGA      |                                             |
| <i>OsAGPS2b</i>                     | F: AACAATCGAAGCGCGAGAAA      |                                             |
|                                     | R: GCCTGTAGTTGGCACCCAGA      |                                             |
| <i>OsAGPL2</i>                      | F: AGTTCGATTCAAGACGGATAGC    |                                             |
|                                     | R: CGACTTCCACAGGCAGCTTATT    |                                             |
| <i>OsAGPL3</i>                      | F: AAGCCAGCCATGACCATTG       |                                             |
|                                     | R: CACACGGTAGATTCACGAGACAA   |                                             |
| <i>Wx</i>                           | F: GCATCACCGGCATCGTCAAC      |                                             |
|                                     | R: GCCTCGATTGCCGTGGTTG       |                                             |
| <i>OsSSIa</i>                       | F: GCTTCCGGTTTGTGTGTTCA      |                                             |
|                                     | R: CTTAATACTCCCTCAACTCCACCAT |                                             |

|                                       |                            |
|---------------------------------------|----------------------------|
| <i>OsSSIb</i>                         | F: TAGGAGCAACGGTGGAAGTGA   |
|                                       | R: GTGAACGTGAGTACGTGACCAAT |
| <i>OsSSIIa</i>                        | F: AAAATGTGGTTGAAGGCAAGAAT |
|                                       | R: GTGGATACCCCTTCTGGGCTGT  |
| <i>OsSSIIIb</i>                       | F: CAGCAAAGTATACCCCTGTTGT  |
|                                       | R: TGCCATTGCGTTCAAGAGT     |
| <i>GluA3</i>                          | F: TGAAAACCAACCCTGACTCC    |
|                                       | R: ACTCATCTCCCCTGTTGTGC    |
| <i>GluB1</i>                          | F: GCCAAAGTCAGAGCCAAAAG    |
|                                       | R: GAACCAATGTGCAACACCAG    |
| <i>GluB4</i>                          | F: GCGACCAGAAGGCTACAAAG    |
|                                       | R: TTGCTTGTGATCGTTGCTC     |
| <i>GluD1</i>                          | F: AAAGACAATTTCCGACCCCTACG |
|                                       | R: TTAGGAACTGGTAACCCCGCTG  |
| <b>Primers for ChIP-qPCR analysis</b> |                            |
| <i>NF-YB1</i>                         | F: TGGCTGCTTGCATTTGTC      |
|                                       | R: GACCTGTACTATGCT         |
| <i>OsSUT1</i>                         | F: CTCCATGCTACTCCAT        |
|                                       | R: GTCGAGTAGTTATCC         |
| <i>OsGS1;3</i>                        | F: TGTGAATCCGAATCC         |
|                                       | R: CGGTTTCAATTCTCG         |
| <i>FLO6</i>                           | F: CAATAGCAGGCATAAACGCA    |
|                                       | R: TTGGACCTTTCTGCACTGCA    |
| <i>Actin</i>                          | F: GCCACATCACCACAGATGTT    |
|                                       | R: ACTTGTTGAAGGGTGGTC      |

**Supplementary Table S2. Percentage of T<sub>0</sub> plants found with mutation in the target sequence.**

| Targets gene   | NO. of plants examined | NO. of plants with modified | Mutation rate (%) | Homozygous mutations |      | Bi-allele mutations |      |
|----------------|------------------------|-----------------------------|-------------------|----------------------|------|---------------------|------|
|                |                        |                             |                   | Number               | %    | Number              | %    |
| <i>NF-YC12</i> | 32                     | 23                          | 71.9              | 6                    | 18.8 | 15                  | 46.9 |

The bi-allelic mutations includes heterozygous and biallelic mutations.

**Supplementary Table S3. Mutations detected in putative CRISPR/Cas9 off-target sites.**

| Putative off-target locus       | Sequence of the putative off-target site | No. of mismatching bases | No. of plants sequenced | No. of plants with mutations | mutation rate (%) |
|---------------------------------|------------------------------------------|--------------------------|-------------------------|------------------------------|-------------------|
| Os05:13,750,24<br>8..13,750,270 | ATGCCATGGAGGAA<br>TTCTGGAGG              | 2                        | 15                      | 0                            | 0                 |

The PAM motif (NGG) is shown in green; mismatching bases are shown in red.
